# Supplementary material for: Clinical utility of comprehensive circulating tumor DNA genotyping compared with standard of care tissue testing in patients with newly diagnosed metastatic colorectal cancer
Source: PubMed Central journal article supplement (PMC9271474; doi:10.1016/j.esmoop.2022.100481), 2022-05-04

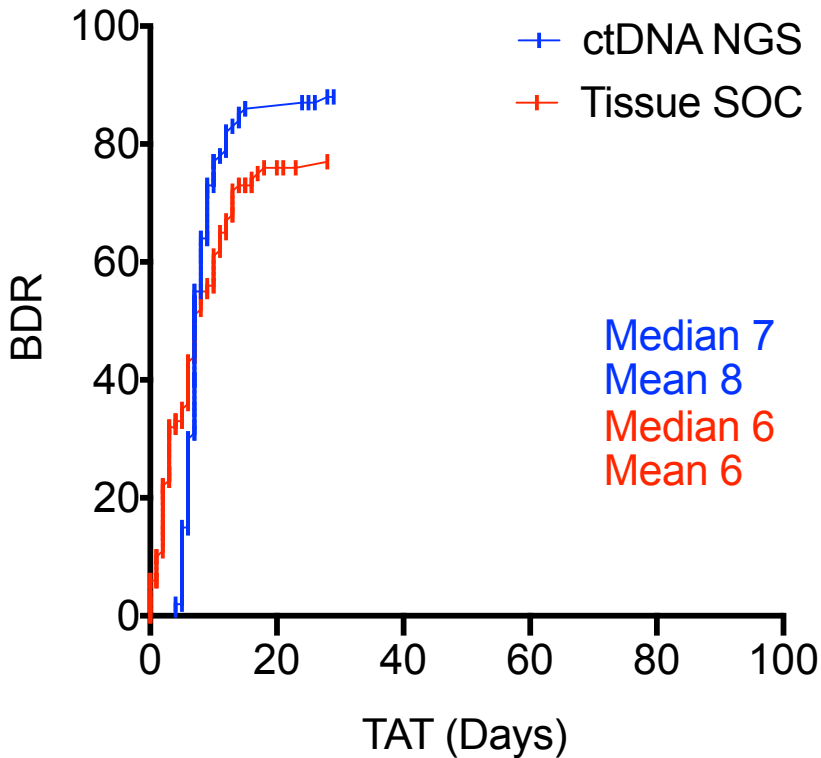

Supplement: mmc1.pdf [file mmc1.pdf]
